# Supplementary material for: Detection of host pathways universally inhibited after Plasmodium yoelii infection for immune intervention
Source: Sci Rep. 2018 Oct 16;8:15280. doi: 10.1038/s41598-018-33599-1 (PMC6191451; doi:10.1038/s41598-018-33599-1)
Supplement: Supplementary file 1 — Supplementary figures and tables [file 41598_2018_33599_MOESM1_ESM.pdf]

## Supplementary Information

### Detection of host pathways universally inhibited after *Plasmodium yoelii* infection for immune intervention

Lu Xia<sup>1,2\*</sup>, Jian Wu<sup>1\*</sup>, Sittiporn Pattaradilokrat<sup>1,3</sup>, Keyla Tumas<sup>1</sup>, Xiao He<sup>1</sup>, Yu-chih Peng<sup>1</sup>, Ruili Huang<sup>4</sup>, Timothy G. Myers<sup>5</sup>, Carole A. Long<sup>1</sup>, Rongfu Wang<sup>6</sup>, Xin-zhuan Su<sup>1#</sup>

<sup>1</sup>Malaria Functional Genomics Section, Laboratory of Malaria and Vector Research, National Institute of Allergy and Infectious Disease, National Institutes of Health, Bethesda, MD 20892-8132, USA;

<sup>2</sup>State Key Laboratory of Medical Genetics, Xiangya School of Medicine, Central South University, Changsha, Hunan 410078, The People's Republic of China;

<sup>3</sup>Department of Biology, Faculty of Science, Chulalongkorn University, Bangkok 10330, Thailand;

<sup>4</sup>National Center for Advancing Translational Sciences, National Institutes of Health, Bethesda, MD 20892-8132, USA;

<sup>5</sup>Genomic Technologies Section, Research Technologies Branch, National Institute of Allergy and Infectious Diseases, National Institutes of Health, Bethesda, MD 20892-8132, USA;

<sup>6</sup>Center for Inflammation and Epigenetics, Houston Methodist Research Institute, Houston, TX 77030, USA

## **Supplementary tables.**

**Supplementary Table S1.** Top 10 most significantly changed pathways day 1 (24h) and day 4 post infection with *Plasmodium y. nigeriensis* N67 and *P. y. yoelii* 17XNL.

**Supplementary Table S2.** Selected enriched and activated or inhibited pathways day 1 and day 4 after infection with *Plasmodium y. nigeriensis* N67 or *P. y. yoelii* 17XNL, sorted by Z-score.

**Supplementary Table S3.** Gene expression levels in selected pathways differentially regulated between day 1 and day 4 post infections with *Plasmodium y. nigeriensis* N67 or *P. y. yoelii* 17XNL.

**Supplementary Table S4.** Gene expression levels in heme biosynthesis pathways differentially regulated between day 1 and day 4 post infection with *Plasmodium y. yoelii* N67.

**Supplementary Table S5.** Upstream regulators of activated or inhibited signaling pathways day 1 and day 4 post infection with *Plasmodium y. nigeriensis* N67 or *Plasmodium y. yoelii* 17XNL.

**Supplementary Table S6.** Z-scores of enriched pathways after infection with *Plasmodium y. nigeriensis* N67, *Plasmodium y. yoelii* 17XNL, and their 24 progeny.

**Supplementary Table S7.** Genes that are significantly differentially expressed in mice infection four *P. yoelii* strains.

## Supplementary Figures

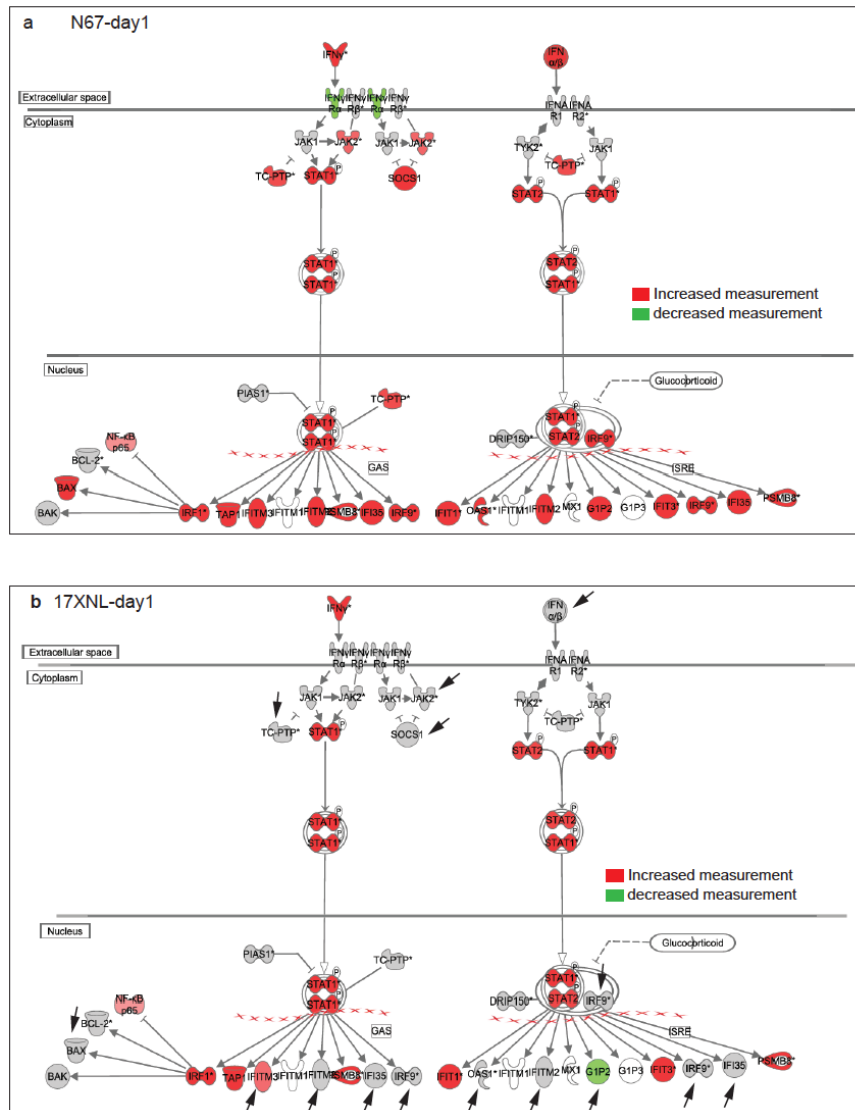

**Supplementary Figure S1.** Comparison of interferon signaling (IFN- $\alpha/\beta$  and IFN- $\gamma$ ) pathways in mice day 1 post infection with N67 (**a**) or 17XNL (**b**). Genes differentially expressed in infected and uninfected mice with a cutoff value of 1.2-fold or larger changes were selected for analysis of gene interaction networks that were generated through the use of IPA (QIAGEN Inc., <https://www.qiagenbio-informatics.com/products/ingenuity-pathway-analysis>). (**a**), Differentially regulated genes in interferon signaling pathways in mice day 1 post infection with

N67 parasite. **(b)**, Differentially regulated genes in interferon signaling pathways in mice day 1 post infection with 17XNL parasite. The names of molecules are as indicated. Red, up-regulated genes; green down-regulated genes. Darker colors suggest higher up- or down-regulated, respectively. Arrows point to genes with lower expression in 17XNL infected mice.

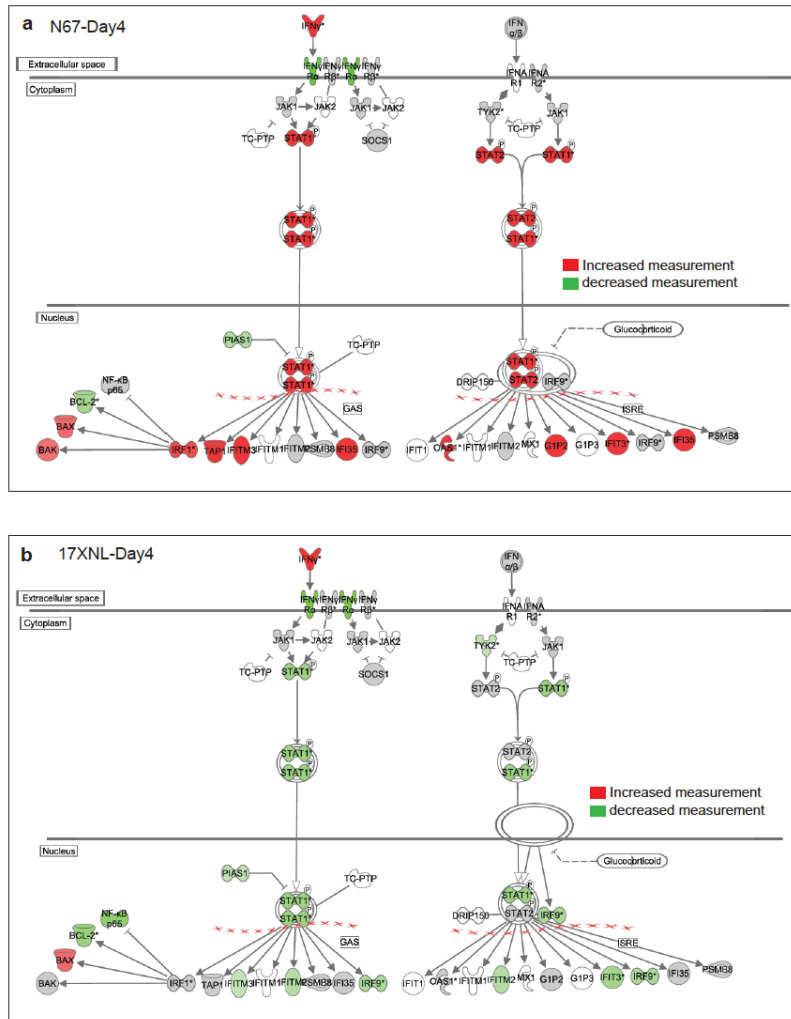

**Supplementary Figure S2.** Comparison of interferon signaling (IFN- $\alpha/\beta$  and IFN- $\gamma$ ) pathways in mice day 4 post infected with N67 **(a)** or 17XNL **(b)**. Genes differentially expressed in infected and uninfected mice with a cutoff value of 1.2-fold or larger changes were selected for

analysis of gene interaction networks that were generated through the use of IPA (QIAGEN Inc., <https://www.qiagenbioinformatics.com/products/ingenuity-pathway-analysis>). **(a)**, Differentially regulated genes in interferon signaling pathways in mice day 4 post infection with N67 parasite. **(b)**, Differentially regulated genes in interferon signaling pathways in mice day 4 post infection with 17XNL parasite. The names of molecules are as indicated. Red, up-regulated genes; green down-regulated genes. Darker colors suggest higher up- or down-regulated, respectively.





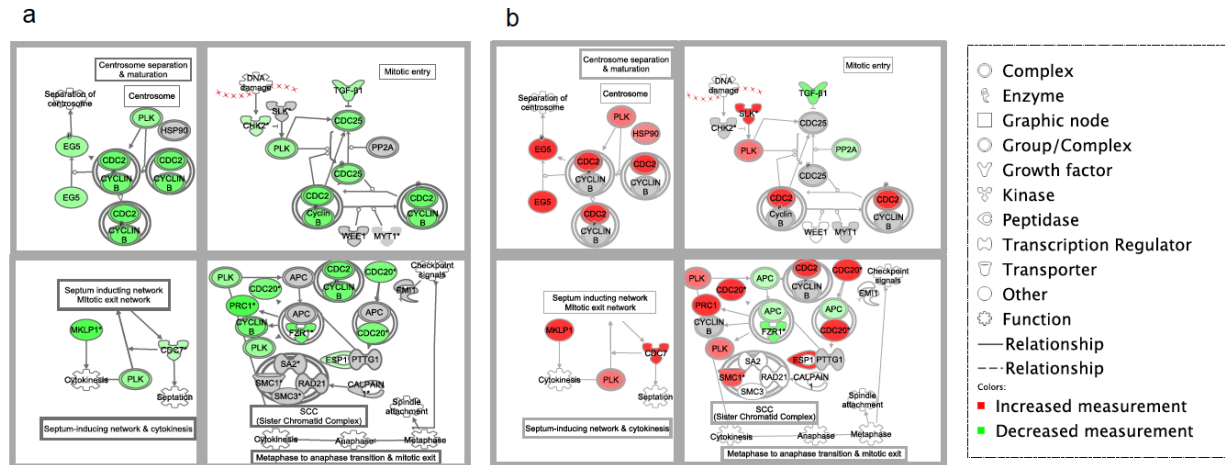

**Supplementary Figure S5.** Expression regulation of genes in mitotic roles of Polo-like kinase pathway day 1 and day 4 post infection with N67. Genes differentially expressed in infected and uninfected mice with a cutoff value of 1.2-fold or larger changes were selected for analysis of gene interaction networks that were generated through the use of IPA (QIAGEN Inc., <https://www.qiagenbio-informatics.com/products/ingenuity-pathway-analysis>). **(a)**, Expression and interaction network of key genes in mitotic roles of Polo-like kinase pathway day 1 post infection with N67. **(b)**, Expression and interaction network of key genes in mitotic roles of Polo-like kinase pathway day 4 post infection with N67. Red, up-regulated genes; green, down-regulated gene. Darker colors suggest higher up- or further down-regulated genes, respectively. Symbols for molecular functions are as presented in the side box.

Original gel images for Figure S3b

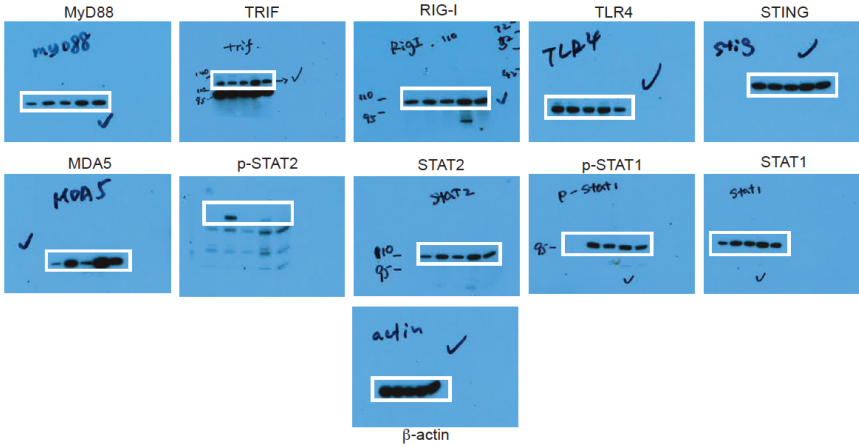

**Supplementary Figure S6.** Original Western blot images for panels in Figure 3b. The areas within the white boxes are cropped and presented.
